# Supplementary material for: WellExplorer: an integrative resource linking hydraulic fracturing chemicals with hormonal pathways and geographic location
Source: Oxford University Press journal article supplement (doi:10.1093/database/baaa053), 2020-01-01
Supplement: hydraulic_fracturing_paper_supplemental_database.pdf [file hydraulic_fracturing_paper_supplemental_database.pdf]

**Supplemental Figures and Tables for:**

**Wetherbee O, Meeker J, DeVoto C, Penning T, Moore J, Boland MR.**

**WellExplorer: An Integrative Resource Linking Hydraulic Fracturing Chemicals with Hormonal Pathways and Geographic Location**

**Table of Contents**

*Tables*

Table S1. Hydraulic Fracturing Ingredients Targeting Estrogen, Testosterone or Hormone Pathways.....2

*Figures*

Figure S1. Illustrative Diagram Detailing the Method of Linking Genes to Estrogen, Hormone and Testosterone Genes and Pathways.....4

**SUPPLEMENTAL MATERIAL****Table S1. Hydraulic Fracturing Ingredients Targeting Estrogen, Testosterone or Hormone Pathways**

| <b>CAS Number</b>                                | <b>Chemical Name</b>                                             |
|--------------------------------------------------|------------------------------------------------------------------|
| <b>Chemicals Targeting Estrogen Pathways</b>     |                                                                  |
| 101-77-9                                         | Benzenamine, 4,4'-methylenebis-                                  |
| 104-40-5                                         | Nonyl Phenol, 4 Mol                                              |
| 106-24-1                                         | 2,6-Octadien-1-ol, 3,7-dimethyl-, (2E)-                          |
| 107-02-8                                         | Acrolein                                                         |
| 107-98-2                                         | 1-Methoxy-2-Propanol                                             |
| 108-38-3                                         | Benzene, 1,3-dimethyl-(Xylene)                                   |
| 108-83-8                                         | Disobutyl Ketone                                                 |
| 110-17-8                                         | Fumaric Acid                                                     |
| 111-42-2                                         | Diethanolamine                                                   |
| 111-44-4                                         | Dichloroethyl ether (DCEE)                                       |
| 117-81-7                                         | Di (2ethylhexyl) Phthalate                                       |
| 126-92-1                                         | Sodium-2-ethylhexyl sulfate                                      |
| 1344-28-1                                        | Aluminum Oxide                                                   |
| 138-22-7                                         | Butyl lactate                                                    |
| 139-13-9                                         | Nitriloacetic Acid                                               |
| 151-21-3                                         | Lauryl Sulfate                                                   |
| 1762-95-4                                        | Ammonium Thiocyanate                                             |
| 25322-69-4                                       | Polypropylene Glycol                                             |
| 486-66-8                                         | Soy Isoflavone                                                   |
| 50-28-2                                          | Silica Substrate                                                 |
| 52-51-7                                          | 2-Bromo-2-Nitro-1,3-Propanediol                                  |
| 62-56-6                                          | Thiourea                                                         |
| 65-85-0                                          | Benzoic Acid                                                     |
| 7429-90-5                                        | Aluminum Needles                                                 |
| 7440-02-0                                        | Nickel                                                           |
| 7446-70-0                                        | Aluminum Chloride                                                |
| 7646-79-9                                        | Cobalt chloride(CoCl <sub>2</sub> )                              |
| 7664-38-2                                        | Phosphoric Acid                                                  |
| 7718-54-9                                        | Nickel(II) Chloride                                              |
| 7786-81-4                                        | Nickel Sulfate                                                   |
| 78-40-0                                          | Triethyl Phosphate                                               |
| 872-50-4                                         | N-Methyl Pyrrolidone                                             |
| 9004-82-4                                        | Alpha-Sulfo-w-(dodecyloxy)-poly(oxyethane-1,2-diyl), sodium salt |
| 92-52-4                                          | BIPHENYL                                                         |
| <b>Chemicals Targeting Testosterone Pathways</b> |                                                                  |
| 10025-91-9                                       | Antimony trichloride                                             |
| 107-98-2                                         | 1-Methoxy-2-Propanol                                             |
| 111-30-8                                         | Glutaraldehyde                                                   |
| 111-40-0                                         | Diethylenetriamine                                               |
| 25038-59-9                                       | Polyethyleneterephthalate                                        |
| 50-28-2                                          | Silica Substrate                                                 |
| 533-74-4                                         | 3,5-Dimethyltetrahydro-1,3,5-thiadiazine-2-thione                |
| 8001-54-5                                        | Quaternary ammonium compounds, alkylbenzyltrimethyl, chlorides   |
| <b>Chemicals Targeting Hormone Pathways</b>      |                                                                  |
| 10025-91-9                                       | Antimony trichloride                                             |
| 101-77-9                                         | Benzenamine, 4,4'-methylenebis-                                  |
| 104-40-5                                         | Nonyl Phenol, 4 Mol                                              |
| 106-24-1                                         | 2,6-Octadien-1-ol, 3,7-dimethyl-,(2E)-                           |

|            |                                                                  |
|------------|------------------------------------------------------------------|
| 107-98-2   | 1-Methoxy-2-Propanol                                             |
| 108-38-3   | Benzene, 1,3-dimethyl-(Xylene)                                   |
| 108-83-8   | Diisobutyl Ketone                                                |
| 111-30-8   | Glutaraldehyde                                                   |
| 111-40-0   | Diethylenetriamine                                               |
| 111-42-2   | Diethanolamine                                                   |
| 111-44-4   | Dichloroethyl ether (DCEE)                                       |
| 112-80-1   | Oleic Acid                                                       |
| 117-81-7   | Di (2ethylhexyl) Phthalate                                       |
| 1184-78-7  | Trimethylamine, N-oxide                                          |
| 126-92-1   | Sodium-2-ethylhexyl sulfate                                      |
| 128-37-0   | Butylated hydroxytoluene                                         |
| 1344-28-1  | Aluminum Oxide                                                   |
| 138-22-7   | Butyl lactate                                                    |
| 139-13-9   | Nitriloacetic Acid                                               |
| 151-21-3   | Lauryl Sulfate                                                   |
| 1762-95-4  | Ammonium Thiocyanate                                             |
| 25038-59-9 | Polyethyleneterephthalate                                        |
| 2634-33-5  | 1,2-Benzisothiazolin-3-one                                       |
| 486-66-8   | Soy Isoflavone                                                   |
| 50-28-2    | Silica Substrate                                                 |
| 52-51-7    | 2-Bromo-2-nitro-1,3-propanediol                                  |
| 533-74-4   | 3,5-Dimethyltetrahydro-1,3,5-thiadiazine-2-thione                |
| 56-86-0    | L-Glutamic acid                                                  |
| 62-56-6    | Thiourea                                                         |
| 64-17-5    | Ethyl Alcohol                                                    |
| 64-19-7    | Acetic Acid                                                      |
| 65-85-0    | Benzoic Acid                                                     |
| 71-43-2    | Benzene                                                          |
| 71-48-7    | Cobalt Acetate                                                   |
| 7429-90-5  | Aluminum Needles                                                 |
| 7440-02-0  | Nickel                                                           |
| 7446-70-0  | Aluminium Chloride                                               |
| 7487-88-9  | Magnesium Sulfate                                                |
| 75-50-3    | Trimethylamine                                                   |
| 7646-79-9  | Cobalt chloride(CoCl <sub>2</sub> )                              |
| 7664-38-2  | Phosphoric Acid                                                  |
| 7664-41-7  | Ammonia                                                          |
| 7718-54-9  | Nickel(II) Chloride                                              |
| 7772-99-8  | Stannous Chloride Dihydrate                                      |
| 7786-81-4  | Nickel Sulfate                                                   |
| 78-40-0    | Triethyl Phosphate                                               |
| 80-08-0    | 4,4'-Diaminodiphenyl sulfone                                     |
| 8001-54-5  | Quaternary ammonium compounds, alkylbenzyltrimethyl, chlorides   |
| 9004-82-4  | Alpha-Sulfo-w-(dodecyloxy)-poly(oxyethane-1,2-diyl), sodium salt |
| 91-20-3    | Naphthalene                                                      |
| 92-52-4    | BIPHENYL                                                         |

| Gene Name | Full Gene Name                                                   | Specific Function                                                                                                                          | Gene Synonyms                                                                                                           | KEGG ID  | Estrogen Gene | Hormone Gene | Testosterone Gene |
|-----------|------------------------------------------------------------------|--------------------------------------------------------------------------------------------------------------------------------------------|-------------------------------------------------------------------------------------------------------------------------|----------|---------------|--------------|-------------------|
| ESR1      | Estrogen receptor                                                | Nuclear hormone receptor...                                                                                                                | ER; ER-alpha; ESR; Estradiol receptor; NR3A1; Nuclear receptor subfamily 3 group A member 1                             | hsa:2099 | Yes           | Yes          | No                |
| HSD17B1   | Estradiol 17-beta-dehydrogenase 1                                | Favors the reduction of estrogens and androgens...                                                                                         | 1.1.1.62; 17-beta-HSD 1; 17-beta-hydroxysteroid dehydrogenase type 1...                                                 | hsa:3292 | Yes           | No           | No                |
| HSD3B1    | 3 beta-hydroxysteroid dehydrogenase/Delta 5-->4-isomerase type 1 | 3-beta-HSD is a bifunctional enzyme... dihydrotestosterone to 5-alpha-androstane-3 beta,17 beta-diol...                                    | 3 beta-hydroxysteroid dehydrogenase/Delta 5-->4-isomerase type I; 3-beta-HSD I; 3BH; HSDB3A; Trophoblast antigen FDO161 | hsa:3283 | No            | No           | Yes               |
| JAK2      | Tyrosine-protein kinase JAK2                                     | ...plays a pivotal role in signal transduction via its association with type I receptors such as growth hormone (GHR), prolactin (PRLR)... | 2.7.10.2; JAK-2; Janus kinase 2                                                                                         | hsa:3717 | No            | Yes          | No                |

KEGG ID Used to Identify  
Other Genes in Same  
Pathway

**Figure S1. Illustrative Diagram Detailing the Method of Linking Genes to Estrogen, Hormone and Testosterone Genes and Pathways.** The pathway linkage was done using the KEGG IDs. For example, JAK2 is labeled as a hormone gene with corresponding KEGG ID (hsa:3717) any other genes in T3DB containing the same KEGG ID (hsa:3717) would be labeled as belonging to the hormone pathway even if the word 'hormone' was not explicitly found in the name, specific function or synonym fields.
